# Supplementary material for: Gram-Scale Synthesis of Pt-Cu Nanowires with Enhanced Electrocatalytic Activity towards Methanol Oxidation Reaction
Source: Hindawi journal article supplement (doi:10.1155/2019/1094308), 2019-12-02
Supplement: f1 [file 1094308.f1.docx]

Electronic Supplementary Materials

Gram-Scale Synthesis of Pt-Cu Nanowires with Enhanced Electrocatalytic Activity towards Methanol Oxidation Reaction

Ning Suia, Hongxu Gaoa, Yukai Wanga, Jiali Lia, Shiyu Qua, Qiang Baia, Hailian Xiaoa, Jing Suia, Manhong Liua,*, William W. Yua,b, *

a College of Materials Science and Engineering, Qingdao University of Science and Technology, Qingdao 266042, China

b Department of Chemistry and Physics, Louisiana State University Shreveport, LA 71115, USA

*Corresponding authors: liumanhong68@126.com (MH Liu), wyu6000@gmail.com (W.W. Yu)


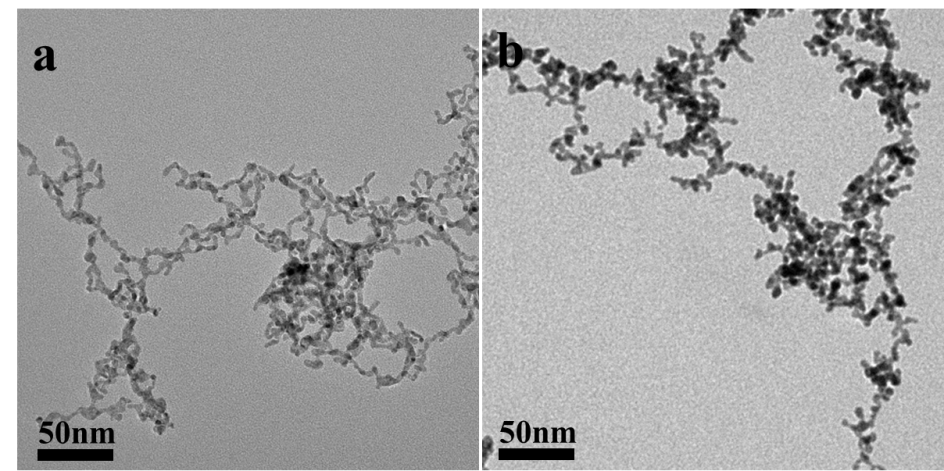


Fig. S1 TEM images of Pt-Cu NWs with different Pt/Cu ratios, (a) 1:4, (b) 4:1.


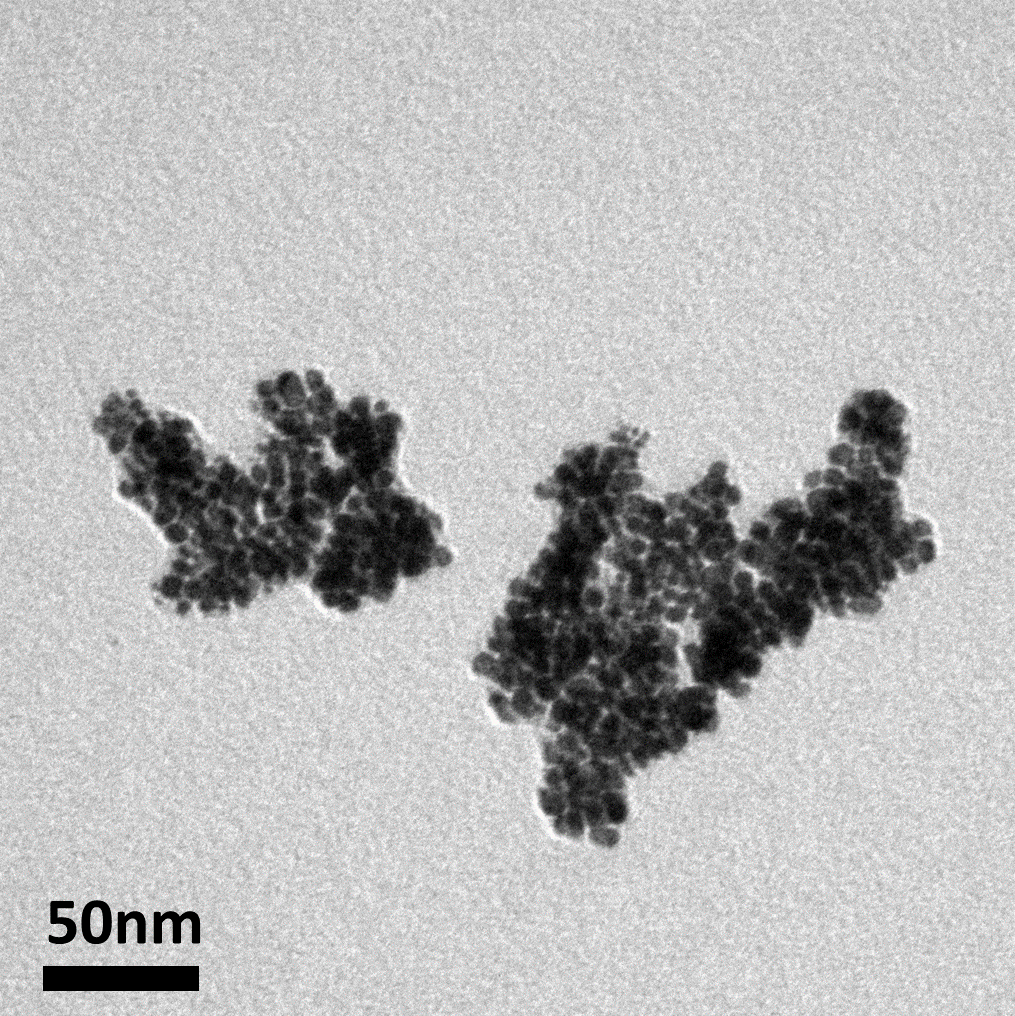


Fig. S2. TEM image of Pt nanoparticles.

**
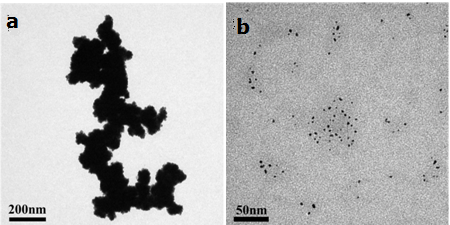
**

Fig. S3. (a) TEM image of Pt-Cu alloy synthesized without addition of any surfactant, (b) TEM image of Pt-Cu nanoparticles obtained by adding PVP.


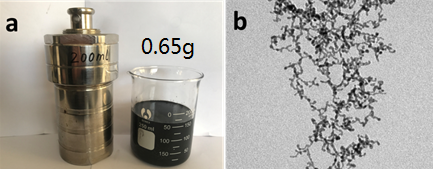


Fig. S4. (a) Photos of the autoclave (200 mL volume) for the synthesis and the resulting product of the NWs. (b) TEM image of the gram-scale synthesis of Pt-Cu NWs.


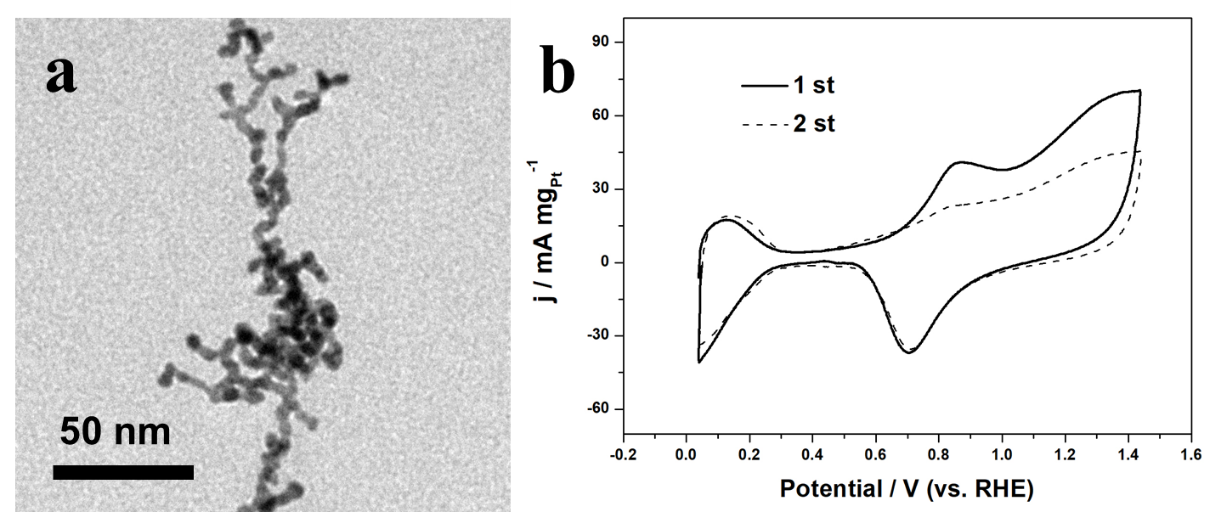


Fig. S5. (a) TEM characterization of the Pt1Cu1 catalyst after the stability test; (b) CO-stripping voltammetry of Pt1Cu1 catalyst after stability test.

Table S1 Elemental analysis of the Pt-Cu NWs analyzed by the ICP-MS

| ICP-MS | Pt / Atomic % | Cu / Atomic % |
| --- | --- | --- |
| Pt1Cu4  Pt1Cu1  Pt4Cu1 | 17.24  44.78  73.33 | 82.76  55.22  26.67 |

Table S2. Comparison of mass activity based on Pt-based catalysts in 0.5 M H2SO4 and 1 M CH3OH.

| **Catalyst** | **Mass activity (mA mg-1)** | **Reference** |
| --- | --- | --- |
| Pd@Pt/C | 111.3 | [1] |
| Mesoporous PtCo nanowires | 84 | [2] |
| ]RuPt nanowire networks | 167 | [3] |
| Pt hollow nanophere | 220 | [4] |
| Nanoporous Pt-Co Nanowires | 258 | [5] |
| PtRu/graphene | 339.2 | [6] |
| Pt-Cu alloy NWs | 295 | This work |

**References:**

1. Q. Wang, Y. J. Li, B. C. Liu, G. R. Xu, G. Zhang, Q. Zhao and J. Zhang, "A facile reflux procedure to increase active surface sites form highly active and durable supported palladium@platinum bimetallic nanodendrites," *Journal of Power Sources*, vol. 297, pp. 59-67, 2015.

2. A. Serra, M. Montiel, E. Gomez and E. Valles, "Electrochemical Synthesis of Mesoporous CoPt Nanowires for Methanol Oxidation," *Nanomaterials*, vol. 4, no. 2, pp. 189-202, 2014.

3. W. Y. Zhao, D. B. Huang, Q. Yuan and X. Wang, "Sub-2.0-nm Ru and composition-tunable RuPt nanowire networks," *Nano Research*, vol. 9, no. 10, pp. 3066-3074, 2016.

4. M. Y. Yang, Q. X. Cai, C. Liu, R. Wu, D. M. Sun, Y. Chen, Y. W. Tang and T. H. Lu, "Monodispersed hollow platinum nanospheres: facile synthesis and their enhanced electrocatalysis for methanol oxidation," *Journal of Materials Chemistry A*, vol. 2, no. 33, pp. 13738-13743, 2014.

5. L. F. Liu, E. Pippel, R. Scholz and U. Gosele, "Nanoporous Pt-Co Alloy Nanowires: Fabrication, Characterization, and Electrocatalytic Properties," *Nano Letters*, vol. 9, no. 12, pp. 4352-4358, 2009.

6. Z. Bo, D. Hu, J. Kong, J. H. Yan and K. F. Cen, "Performance of vertically oriented graphene supported platinum-ruthenium bimetallic catalyst for methanol oxidation," *Journal of Power Sources*, vol. 273, pp. 530-537, 2015.
